# Supplementary material for: Bidirectional heterostructures consisting of graphene and lateral MoS2/WS2 composites: a first-principles study
Source: Royal Society of Chemistry journal article supplement (doi:10.1039/c9ra05692k), 2019-01-01
Supplement: c9ra05692k1.pdf [file c9ra05692k1.pdf]

# Bidirectional heterostructures consisting of graphene and lateral MoS<sub>2</sub>/WS<sub>2</sub> composites: first principles study

Yingqi Tang<sup>a §</sup>, Hao Li<sup>b §</sup>, Xiaotong Mao<sup>a</sup>, Ju Xie<sup>c</sup>, Jin Yong Lee<sup>b\*</sup>, Aiping Fu<sup>a\*</sup>

<sup>a</sup> College of Chemistry and Chemical Engineering & State Key Laboratory of Bio-Fibers and Eco-Textiles, Qingdao University, Qingdao 266071, China

<sup>b</sup> Department of Chemistry, Sungkyunkwan University, Suwon 16419, Korea

<sup>c</sup> College of Chemistry and Chemical Engineering, Yangzhou University, Yangzhou 225002, China

§ These authors contributed equally to this work.

## Supplementary Information

### Contents

**Figure S1** The calculated band structures of (MoS<sub>2</sub>)<sub>x</sub>/(WS<sub>2</sub>)<sub>4-x</sub> monolayer under different electric field intensity.

**Figure S2** The configurations of G@(MoS<sub>2</sub>)<sub>x</sub>/(WS<sub>2</sub>)<sub>4-x</sub> (x = 0, 1, 2, 3, 4) heterobilayer.

**Figure S3** The PDOS of MoS<sub>2</sub> and WS<sub>2</sub>.

**Figure S4.** The band structure of G-MoS<sub>2</sub> at the GGA+U level.

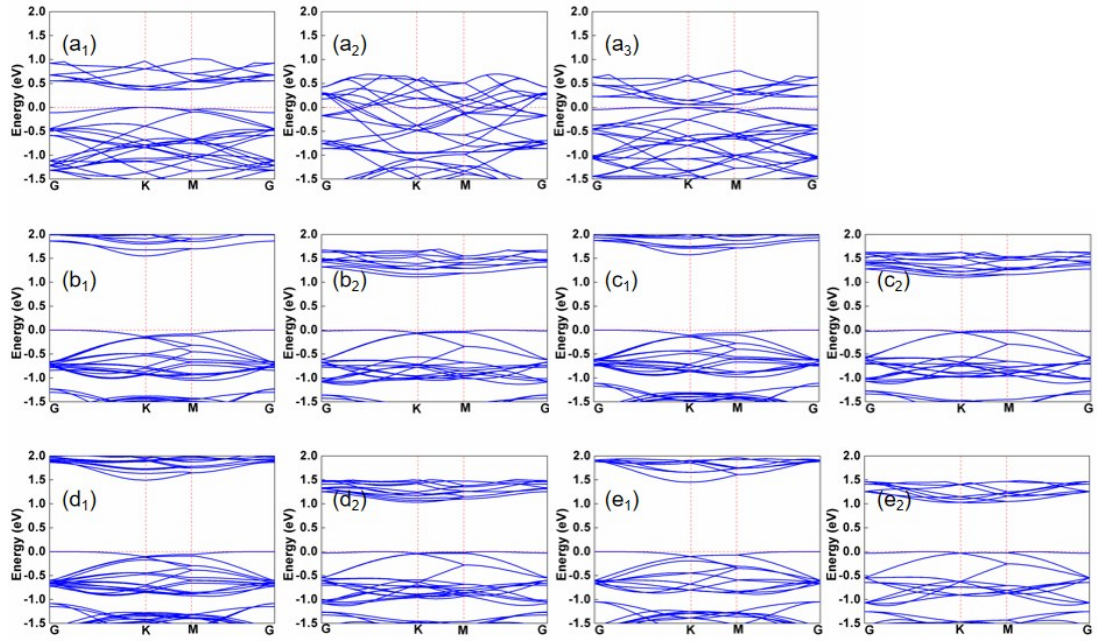

**Figure S1.** The band structures of  $\text{WS}_2$  ( $a_{1-2}$ ),  $(\text{MoS}_2)_1/(\text{WS}_2)_3$  ( $b_{1-2}$ ),  $(\text{MoS}_2)_2/(\text{WS}_2)_2$  ( $c_{1-2}$ ),  $(\text{MoS}_2)_3/(\text{WS}_2)_1$  ( $d_{1-2}$ ) and  $\text{MoS}_2$  ( $e_{1-2}$ ) under the electric field intensity at  $F=0.5$  and  $1.0 \text{ V \AA}^{-1}$  (1-2), and  $a_3$  is the band structure of  $\text{WS}_2$  at  $F=0.6 \text{ V \AA}^{-1}$ . The horizontal red lines represent the Fermi level.

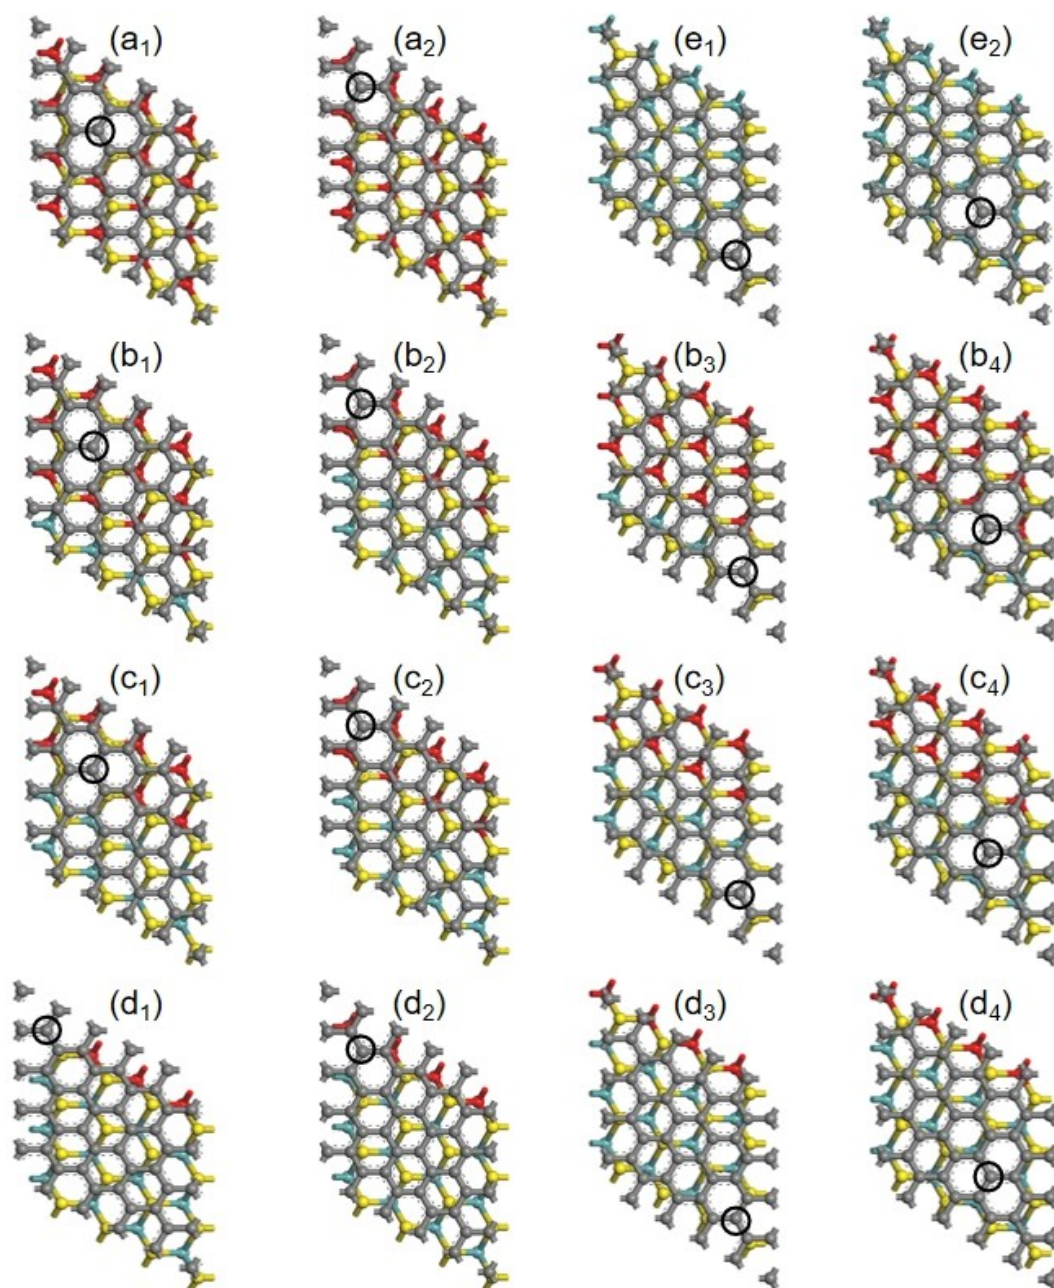

**Figure S2.** Top views of the configurations for  $G@(\text{MoS}_2)_x/(\text{WS}_2)_{4-x}$  heterobilayer:  $G@WS_2$  ( $a_{1-2}$ ),  $G@(\text{MoS}_2)_1/(\text{WS}_2)_3$  ( $b_{1-4}$ ),  $G@(\text{MoS}_2)_2/(\text{WS}_2)_2$  ( $c_{1-4}$ ),  $G@(\text{MoS}_2)_3/(\text{WS}_2)_1$  ( $d_{1-4}$ ) and  $G@MoS_2$  ( $e_{1-2}$ ). The gray, yellow, green, and red balls denote C, S, Mo, W atoms, respectively.

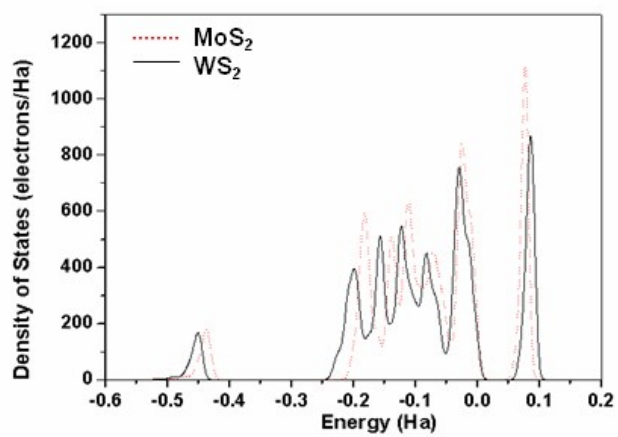

Figure S3. The PDOS of MoS<sub>2</sub> and WS<sub>2</sub>.

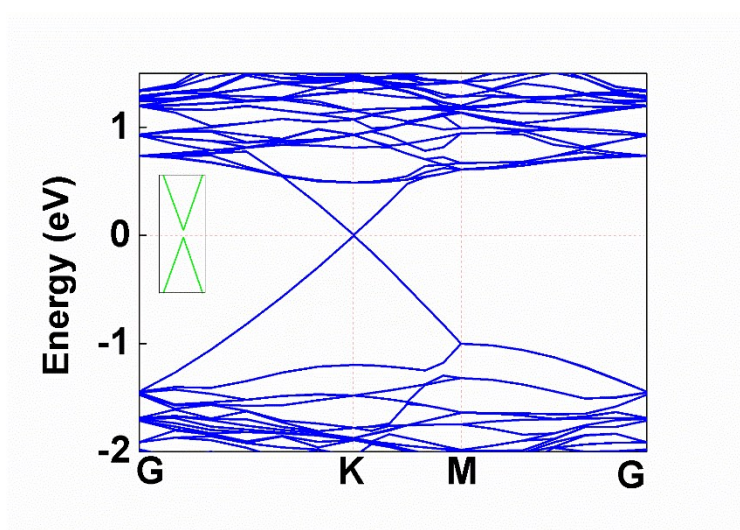

Figure S4. The band structure of G-MoS<sub>2</sub> at the GGA+U level.
